# Supplementary material for: Zooming In on Choice: How Do Consumers Search for Cameras Online?
Source: Atypon-hosted journal article supplement (doi:10.1287/mksc.2016.0977), 2016-05-21
Supplement: mksc.2016.0977-sm.pdf [file mksc.2016.0977-sm.pdf]

# **Zooming In on Choice: How Do Consumers Search for Cameras Online?**

Bart J. Bronnenberg

Jun B. Kim

Carl F. Mela\*

Online Appendix

This online companion appendix contains several robustness checks and auxiliary results to the published version of this paper.

---

\*bart.bronnenberg@uvt.nl; junkim@ust.hk; mela@duke.edu

**Part I**  
**Additional Tables**

Table 1: Descriptive statistics on camera searches

|             | mean   | 10 <sup>th</sup> pct | 25 <sup>th</sup> pct | 75 <sup>th</sup> pct | 90 <sup>th</sup> pct | std dev | <i>N</i> |
|-------------|--------|----------------------|----------------------|----------------------|----------------------|---------|----------|
| domain      | 3.547  | 1.000                | 1.000                | 4.000                | 8.000                | 4.461   | 967      |
| brand       | 2.786  | 1.000                | 1.000                | 4.000                | 6.000                | 2.245   | 967      |
| model       | 6.425  | 1.000                | 2.000                | 8.000                | 14.000               | 8.573   | 967      |
| product     | 9.043  | 1.000                | 2.000                | 10.000               | 21.000               | 13.836  | 967      |
| searches    | 13.935 | 2.000                | 3.000                | 15.000               | 32.000               | 24.460  | 967      |
| passed time | 15.261 | 0.007                | 0.024                | 19.537               | 53.169               | 26.239  | 967      |

Note: Domain denotes the number of domain names visited, e.g., www.amazon.com, a product is a combination of domain/brand/model, the number of searches is the sum of the number of different URL's times the frequency that each URL was visited by a single consumer, passed time is the time elapsed in days between the beginning of search and purchasing a camera.

Table 2: Estimates of Equation (1) across all attributes

|                     | slope            | intercept         | $R^2$ | $F$    | $p$   |
|---------------------|------------------|-------------------|-------|--------|-------|
| Canon               | 0.919<br>(0.029) | -0.023<br>(0.010) | 0.580 | 13.915 | 0.000 |
| Nikon               | 1.001<br>(0.032) | -0.019<br>(0.012) | 0.566 | 1.889  | 0.152 |
| Kodak               | 1.054<br>(0.036) | 0.030<br>(0.012)  | 0.527 | 8.421  | 0.000 |
| slr                 | 0.903<br>(0.022) | -0.023<br>(0.006) | 0.709 | 28.551 | 0.000 |
| image stabilization | 0.989<br>(0.038) | 0.028<br>(0.024)  | 0.485 | 1.459  | 0.233 |
| face detection      | 0.741<br>(0.039) | 0.272<br>(0.036)  | 0.340 | 35.885 | 0.000 |
| movie               | 0.669<br>(0.030) | 0.344<br>(0.029)  | 0.405 | 84.848 | 0.000 |
| log_display         | 1.341<br>(0.050) | -0.335<br>(0.052) | 0.496 | 27.759 | 0.000 |
| log_pixel           | 0.685<br>(0.037) | 0.810<br>(0.091)  | 0.327 | 49.850 | 0.000 |
| log_price           | 0.911<br>(0.026) | 0.279<br>(0.133)  | 0.626 | 52.853 | 0.000 |
| log_zoom            | 1.061<br>(0.029) | -0.082<br>(0.049) | 0.649 | 2.690  | 0.069 |
| Amazon.com          | 1.027<br>(0.034) | 0.069<br>(0.015)  | 0.545 | 21.360 | 0.000 |
| BestBuy.com         | 0.964<br>(0.035) | 0.021<br>(0.010)  | 0.499 | 2.293  | 0.102 |
| Walmart.com         | 0.990<br>(0.030) | 0.052<br>(0.013)  | 0.594 | 10.435 | 0.000 |

Note: Standard errors in parentheses. The  $F$  test is on the joint hypothesis that the effect of the mean attribute level in search on the attribute of choice is 1 and the intercept is 0. The reported  $p$  is the associated  $p$ -level of the test.

Table 3: Estimates of Equation (1) across all attributes using only early search

|                     | slope            | intercept         | $R^2$ | $F$     | $p$   |
|---------------------|------------------|-------------------|-------|---------|-------|
| Canon               | 0.675<br>(0.032) | 0.017<br>(0.012)  | 0.370 | 61.259  | 0.000 |
| Nikon               | 0.659<br>(0.038) | 0.051<br>(0.015)  | 0.292 | 43.017  | 0.000 |
| Kodak               | 0.644<br>(0.042) | 0.108<br>(0.015)  | 0.236 | 41.331  | 0.000 |
| slr                 | 0.674<br>(0.026) | -0.007<br>(0.009) | 0.487 | 104.827 | 0.000 |
| image stabilization | 0.635<br>(0.042) | 0.221<br>(0.026)  | 0.245 | 41.139  | 0.000 |
| face detection      | 0.324<br>(0.035) | 0.658<br>(0.032)  | 0.108 | 208.936 | 0.000 |
| movie               | 0.331<br>(0.028) | 0.666<br>(0.026)  | 0.165 | 330.700 | 0.000 |
| log_display         | 0.501<br>(0.070) | 0.534<br>(0.072)  | 0.067 | 32.445  | 0.000 |
| log_pixel           | 0.270<br>(0.029) | 1.839<br>(0.071)  | 0.110 | 347.420 | 0.000 |
| log_price           | 0.714<br>(0.029) | 1.254<br>(0.151)  | 0.455 | 102.424 | 0.000 |
| log_zoom            | 0.783<br>(0.037) | 0.366<br>(0.062)  | 0.382 | 17.616  | 0.000 |
| Amazon.com          | 0.785<br>(0.040) | 0.160<br>(0.017)  | 0.338 | 46.161  | 0.000 |
| BestBuy.com         | 0.639<br>(0.040) | 0.063<br>(0.012)  | 0.258 | 43.360  | 0.000 |
| Walmart.com         | 0.678<br>(0.037) | 0.144<br>(0.017)  | 0.312 | 49.794  | 0.000 |

Note: This table reports on how informative early search is about choice. Early search is defined as the average attribute level computed over the first half of the search sequence for each household. Standard errors in parentheses. The  $F$  test is on the joint hypothesis that the effect of the mean attribute level in search on the attribute of choice is 1 and the intercept is 0. The reported  $p$  is the associated  $p$ -level of the test.

Table 4: Estimates of Equation (3) across all attributes

|                     | machine-id<br>fixed effects | search<br>sequence<br>fixed effects | machine_id<br>plus sequence<br>fixed effects |
|---------------------|-----------------------------|-------------------------------------|----------------------------------------------|
| Canon               | 0.446                       | 0.000                               | 0.446                                        |
| Nikon               | 0.410                       | 0.000                               | 0.410                                        |
| Kodak               | 0.467                       | 0.000                               | 0.467                                        |
| slr                 | 0.658                       | 0.000                               | 0.659                                        |
| image stabilization | 0.433                       | 0.001                               | 0.433                                        |
| face detection      | 0.239                       | 0.002                               | 0.240                                        |
| movie               | 0.320                       | 0.002                               | 0.323                                        |
| log_display         | 0.269                       | 0.003                               | 0.272                                        |
| log_pixel           | 0.284                       | 0.003                               | 0.287                                        |
| log_price           | 0.707                       | 0.001                               | 0.707                                        |
| log_zoom            | 0.452                       | 0.000                               | 0.453                                        |
| Amazon.com          | 0.487                       | 0.003                               | 0.490                                        |
| BestBuy.com         | 0.495                       | 0.001                               | 0.497                                        |
| Walmart.com         | 0.565                       | 0.000                               | 0.565                                        |

Note: Reported are  $R^2$  statistics of fixed effects regressions of the searched levels of attributes.

Table 5: Robustness of Table 3 reported in the paper using searches and only first time visits

|                     | intercept        | first lag        | $\chi^2$ | $p$   | $N$ |
|---------------------|------------------|------------------|----------|-------|-----|
| Canon               | 0.155<br>(0.005) | 0.251<br>(0.016) | 256.829  | 0.000 | 742 |
| Nikon               | 0.159<br>(0.005) | 0.255<br>(0.016) | 264.064  | 0.000 | 742 |
| Kodak               | 0.113<br>(0.004) | 0.192<br>(0.016) | 152.328  | 0.000 | 742 |
| slr                 | 0.133<br>(0.004) | 0.208<br>(0.017) | 151.128  | 0.000 | 736 |
| image stabilization | 0.459<br>(0.010) | 0.135<br>(0.017) | 59.896   | 0.000 | 736 |
| face detection      | 0.814<br>(0.016) | 0.098<br>(0.018) | 30.408   | 0.000 | 736 |
| movie               | 0.760<br>(0.016) | 0.169<br>(0.018) | 91.438   | 0.000 | 736 |
| log_display         | 0.859<br>(0.019) | 0.162<br>(0.018) | 79.367   | 0.000 | 736 |
| log_pixel           | 2.043<br>(0.047) | 0.168<br>(0.019) | 77.351   | 0.000 | 736 |
| log_price           | 4.193<br>(0.111) | 0.205<br>(0.021) | 96.316   | 0.000 | 728 |
| log_zoom            | 1.319<br>(0.029) | 0.179<br>(0.018) | 100.159  | 0.000 | 734 |
| Amazon.com          | 0.179<br>(0.005) | 0.216<br>(0.016) | 178.905  | 0.000 | 742 |
| BestBuy.com         | 0.053<br>(0.003) | 0.426<br>(0.016) | 696.684  | 0.000 | 742 |
| Walmart.com         | 0.091<br>(0.004) | 0.443<br>(0.016) | 787.707  | 0.000 | 742 |

Note: This is a robustness check to the results reported in the paper. See the notes of Table 3 in the paper.

Table 6: Robustness of Table 3 in the paper using deciles based on only first time visits

|                     | intercept        | first lag        | $\chi^2$ | $p$   | $N$ |
|---------------------|------------------|------------------|----------|-------|-----|
| Canon               | 0.152<br>(0.008) | 0.253<br>(0.027) | 87.554   | 0.000 | 504 |
| Nikon               | 0.158<br>(0.008) | 0.279<br>(0.027) | 104.406  | 0.000 | 504 |
| Kodak               | 0.090<br>(0.006) | 0.298<br>(0.027) | 120.934  | 0.000 | 504 |
| slr                 | 0.129<br>(0.006) | 0.210<br>(0.028) | 56.294   | 0.000 | 500 |
| image stabilization | 0.468<br>(0.016) | 0.103<br>(0.028) | 13.081   | 0.000 | 500 |
| face detection      | 0.847<br>(0.028) | 0.066<br>(0.031) | 4.486    | 0.034 | 500 |
| movie               | 0.867<br>(0.028) | 0.060<br>(0.030) | 3.946    | 0.047 | 500 |
| log_display         | 0.741<br>(0.028) | 0.277<br>(0.027) | 102.866  | 0.000 | 500 |
| log_pixel           | 2.136<br>(0.075) | 0.129<br>(0.031) | 17.797   | 0.000 | 500 |
| log_price           | 4.431<br>(0.180) | 0.160<br>(0.034) | 22.069   | 0.000 | 491 |
| log_zoom            | 1.351<br>(0.049) | 0.159<br>(0.030) | 27.925   | 0.000 | 500 |
| Amazon.com          | 0.181<br>(0.008) | 0.195<br>(0.028) | 47.372   | 0.000 | 504 |
| BestBuy.com         | 0.054<br>(0.005) | 0.466<br>(0.027) | 304.714  | 0.000 | 504 |
| Walmart.com         | 0.098<br>(0.006) | 0.374<br>(0.028) | 174.194  | 0.000 | 504 |

Note: This is a robustness check to the results reported in the paper. See the notes of Table 3 in the paper.

Table 7: Robustness of Table 4 in the paper using first visits only

|                     | intercept         | slope            | carry-over       | $\sigma$ | $\chi^2(2)$ | $p$   | $N$ |
|---------------------|-------------------|------------------|------------------|----------|-------------|-------|-----|
| Canon               | -0.012<br>(0.008) | 0.919<br>(0.023) | 0.732<br>(0.029) | 0.209    | 27.089      | 0.000 | 914 |
| Nikon               | 0.002<br>(0.009)  | 0.933<br>(0.024) | 0.527<br>(0.047) | 0.218    | 10.436      | 0.005 | 914 |
| Kodak               | 0.030<br>(0.009)  | 0.935<br>(0.025) | 0.465<br>(0.060) | 0.233    | 11.491      | 0.003 | 914 |
| slr                 | -0.004<br>(0.005) | 0.955<br>(0.017) | 0.518<br>(0.043) | 0.128    | 11.020      | 0.004 | 880 |
| image stabilization | 0.028<br>(0.018)  | 0.955<br>(0.029) | 0.657<br>(0.035) | 0.311    | 2.695       | 0.260 | 880 |
| face detection      | 0.167<br>(0.029)  | 0.842<br>(0.030) | 0.634<br>(0.039) | 0.148    | 43.120      | 0.000 | 880 |
| movie               | 0.233<br>(0.026)  | 0.770<br>(0.027) | 0.372<br>(0.069) | 0.109    | 86.928      | 0.000 | 880 |
| log_display         | 0.023<br>(0.024)  | 0.984<br>(0.023) | 0.446<br>(0.039) | 0.095    | 4.543       | 0.103 | 879 |
| log_pixel           | 0.153<br>(0.064)  | 0.945<br>(0.026) | 0.628<br>(0.029) | 0.141    | 18.616      | 0.000 | 880 |
| log_price           | 0.271<br>(0.110)  | 0.923<br>(0.022) | 0.730<br>(0.032) | 0.465    | 66.744      | 0.000 | 913 |
| log_zoom            | -0.049<br>(0.037) | 1.034<br>(0.022) | 0.721<br>(0.025) | 0.335    | 2.357       | 0.308 | 875 |
| Amazon.com          | 0.061<br>(0.012)  | 0.963<br>(0.028) | 0.674<br>(0.039) | 0.293    | 28.962      | 0.000 | 914 |
| BestBuy.com         | 0.020<br>(0.007)  | 0.945<br>(0.023) | 0.423<br>(0.036) | 0.196    | 9.688       | 0.008 | 914 |
| Walmart.com         | 0.040<br>(0.009)  | 0.954<br>(0.018) | 0.414<br>(0.049) | 0.224    | 18.630      | 0.000 | 914 |

Note: This is a robustness check to the table reported in the paper. See the notes of Table 4 in the paper.

Table 8: The effect of domain switching on exploration of the attribute levels

|                       | display           | pixel             | price             | zoom              |
|-----------------------|-------------------|-------------------|-------------------|-------------------|
| constant              | 0.251<br>(0.040)  | 0.168<br>(0.008)  | 0.114<br>(0.009)  | 0.129<br>(0.008)  |
| domain switch         | -0.014<br>(0.023) | -0.011<br>(0.004) | -0.014<br>(0.005) | -0.006<br>(0.005) |
| decile fixed effects  | yes               | yes               | yes               | yes               |
| machine fixed effects | yes               | yes               | yes               | yes               |
| $R^2$                 | 0.662             | 0.729             | 0.501             | 0.548             |
| $N$                   | 4590              | 4591              | 4502              | 4585              |

Note: Reported estimates are for  $\alpha_k$  and  $\beta_k$  in the regression equation

$$\delta_{ikd} = \alpha_k + \alpha_{ik} + \alpha_{dk} + \beta_k \mathbb{I}(\text{domainswitch}_{id}) + \varepsilon_{ikd},$$

where  $\mathbb{I}(\text{domainswitch}_{id})$  has the value 1 if there was at least one domain switch in decile  $d$  for machine  $i$ , and where  $\delta_{ikd}$  is defined in equation (7) in the paper.

**Part II**  
**Additional Figures**

Figure 1: Reproduction of Figure 2 without revisits

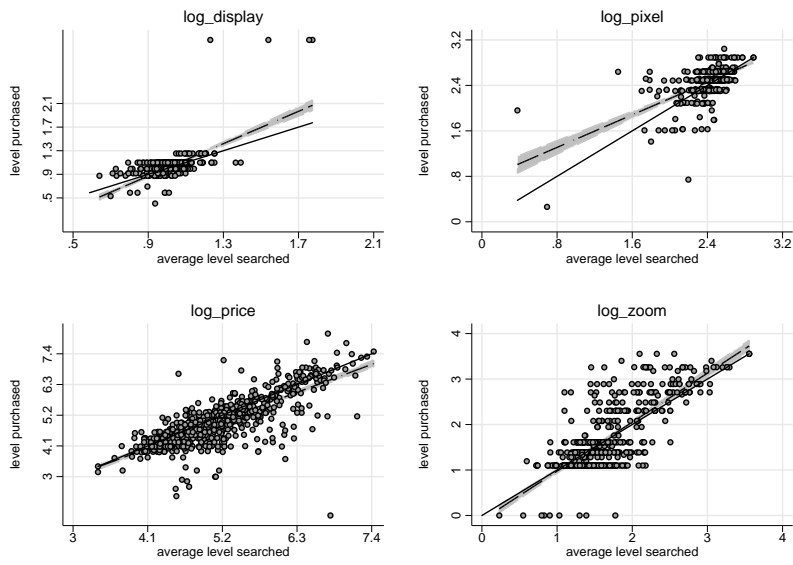

Notes: The same notes apply as to Figure 2 in the paper.

Figure 2: Reproduction of Figure 2 without the chosen product in the search sequence

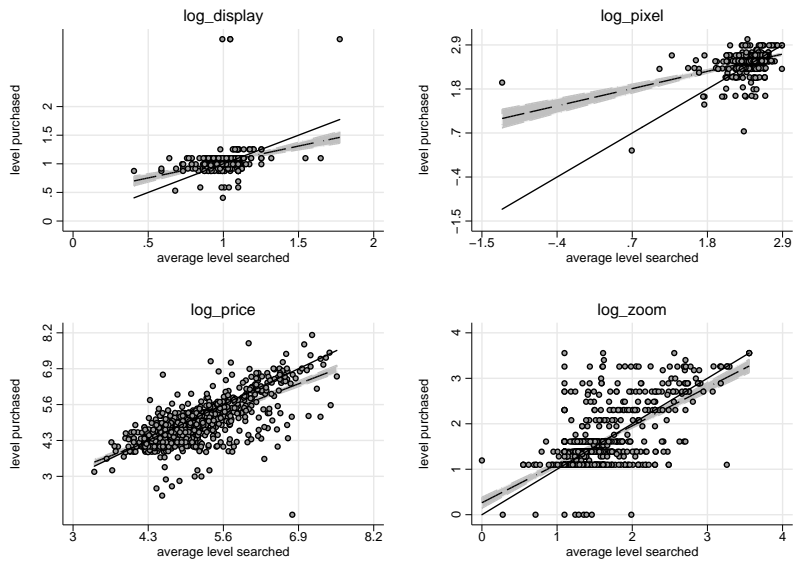

Notes: The same notes apply as to Figure 2 in the paper.

Figure 3: Reproduction of Figure 4 without the chosen product in the search sequence

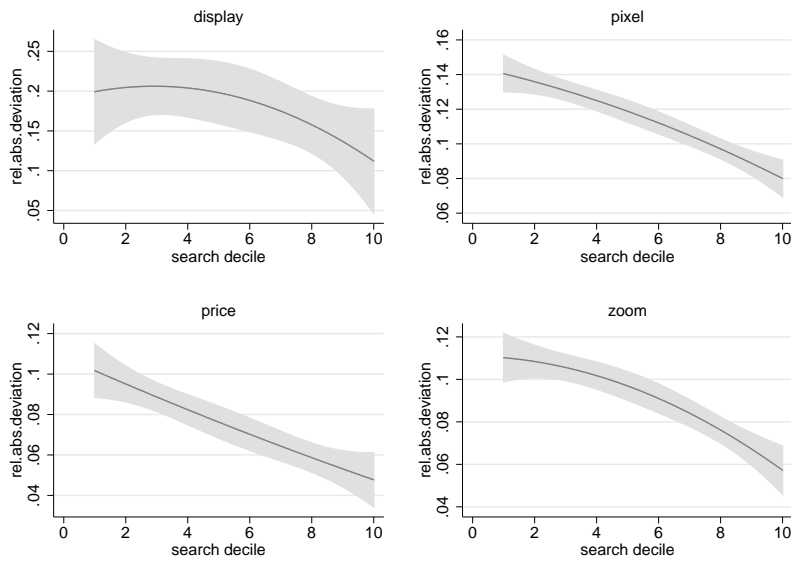

Notes: The same notes apply as to Figure 4 in the paper.

Figure 4: Reproduction of Figure 4 for search sequences across multiple domains

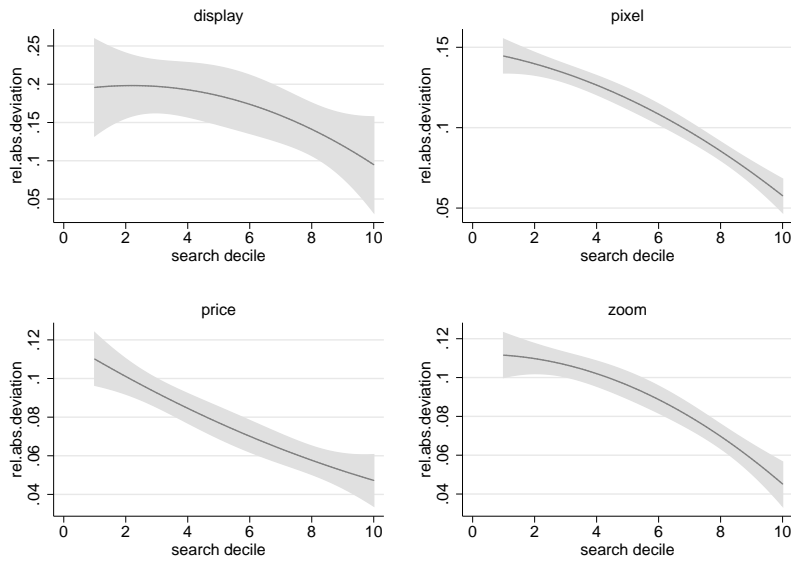

Notes: The same notes apply as to Figure 4 in the paper.

Figure 5: Reproduction of Figure 5 when dropping revisits

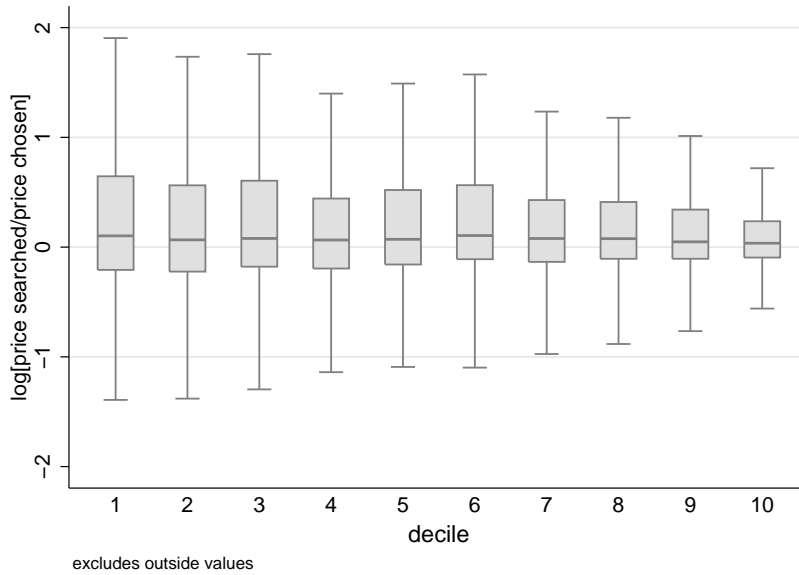

Notes: The same notes apply as to Figure 5 in the paper.

Figure 6: Price dispersion for the same camera across top-3 sellers

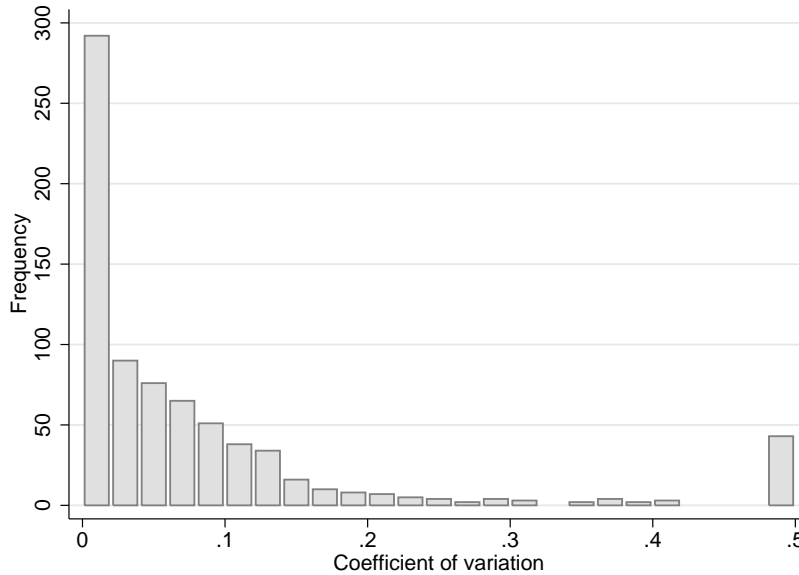

Notes: This figure plots the histogram of the coefficient of variation for price across the top-3 sellers, i.e., for which we have high quality price data. The histogram shows the coefficient of (price) variation for combinations of brand/model/month with at least two observations of price in our search data. All observations with a coefficient of variation larger than .5 are represented at the right side of the axis.

Figure 7: Reproduction of Figure 7 for long search strings (>10 searches)

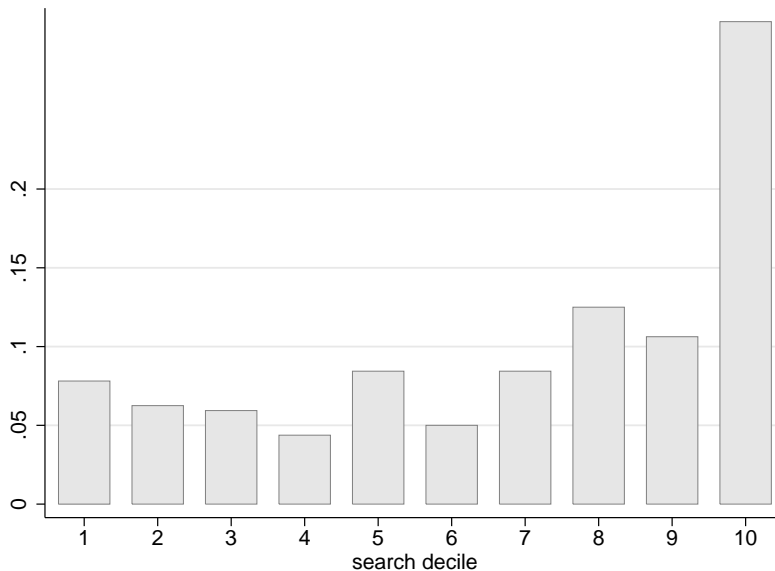

Notes: This same notes apply as to Figure 7 in the paper.

Figure 8: Time lapse by decile

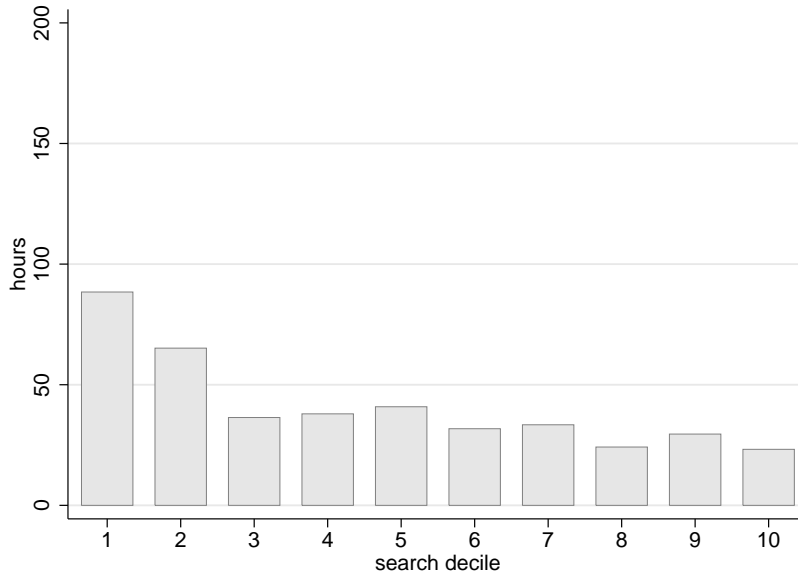

Notes: This graph represents the average time lapse for each search decile. The data used to create this graph involve search processes with at least 10 searches.

Figure 9: Share of non-retail visits across deciles

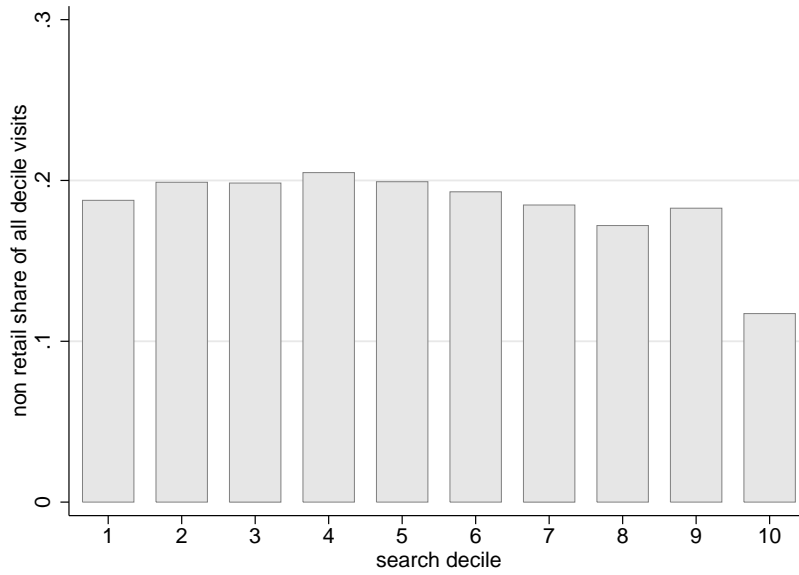

Notes: This graph represents the share of domain visits in a given decile that was not to a retailer domain.
